# Supplementary material for: Estradiol cycling drives female obesogenic adipocyte hyperplasia
Source: PubMed Central journal article supplement — Cell Rep. Author manuscript; Available in PMC 2023 Oct 23. (PMC10567995; doi:10.1016/j.celrep.2023.112390), 2023-04-12
Supplement: NIHMS1895610-supplement-1.pdf [file NIHMS1895610-supplement-1.pdf]

**Cell Reports, Volume 42**

**Supplemental information**

**Estradiol cycling drives female  
obesogenic adipocyte hyperplasia**

**Rocío del M. Saavedra-Peña, Natalia Taylor, Clare Flannery, and Matthew S. Rodeheffer**

Figure S1

A

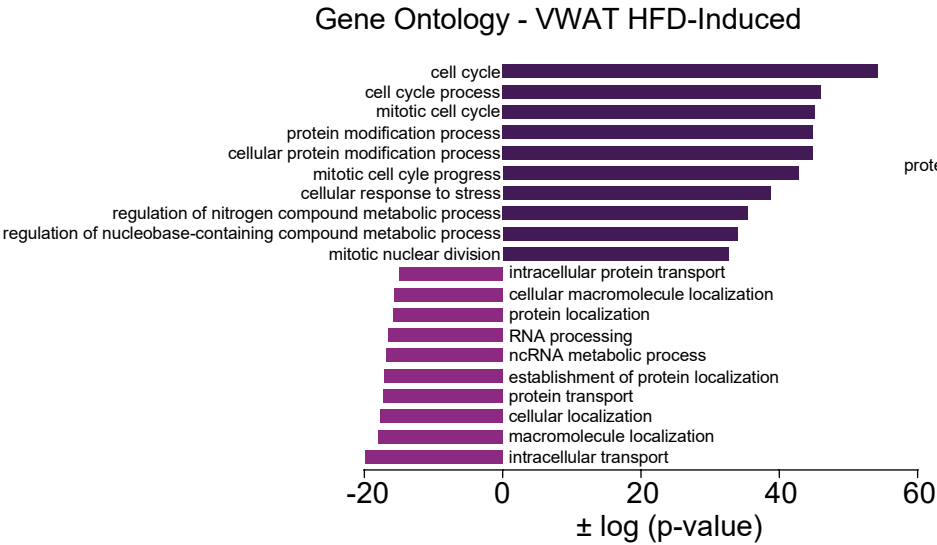

B

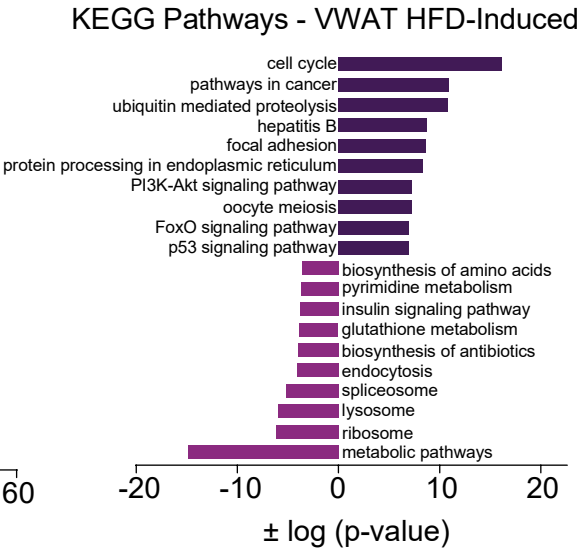

C

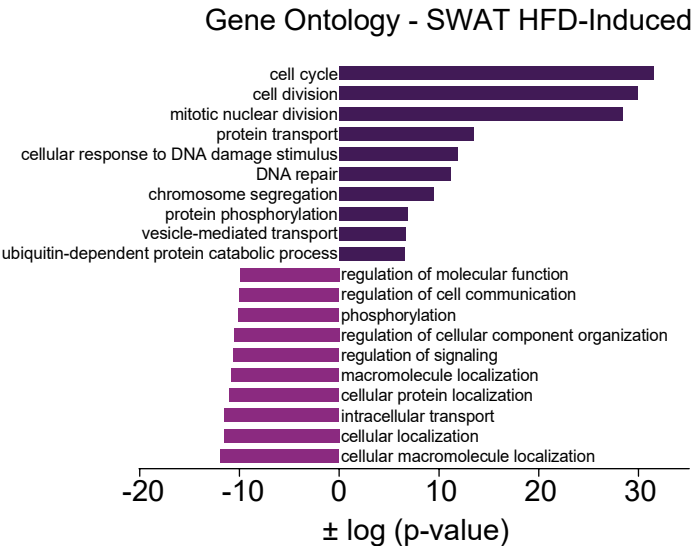

D

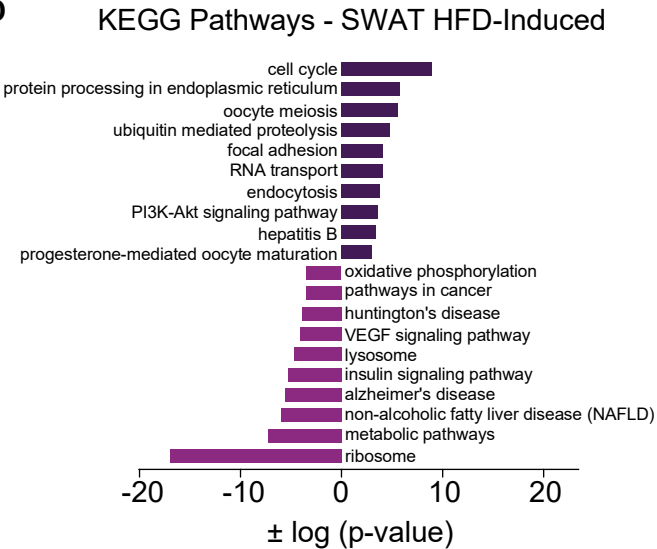

**Figure S1. Cell cycle pathways are upregulated in female APCs at the onset of HFD feeding, Related to Figure 1.**

Top diet-induced upregulated (positive) and downregulated (negative) GO terms **(A)** and KEGG pathways **(B)** in VWAT APCs. Top diet-induced upregulated (positive) and downregulated (negative) GO terms **(C)** and KEGG pathways **(D)** in SWAT APCs. N= 5 samples per group, 3 mice pooled for each sample. GO: gene ontology, KEGG: Kyoto encyclopedia of genes and genomes, VWAT: perigonadal fat, SWAT: inguinal subcutaneous fat, HFD: high-fat diet.

Figure S2

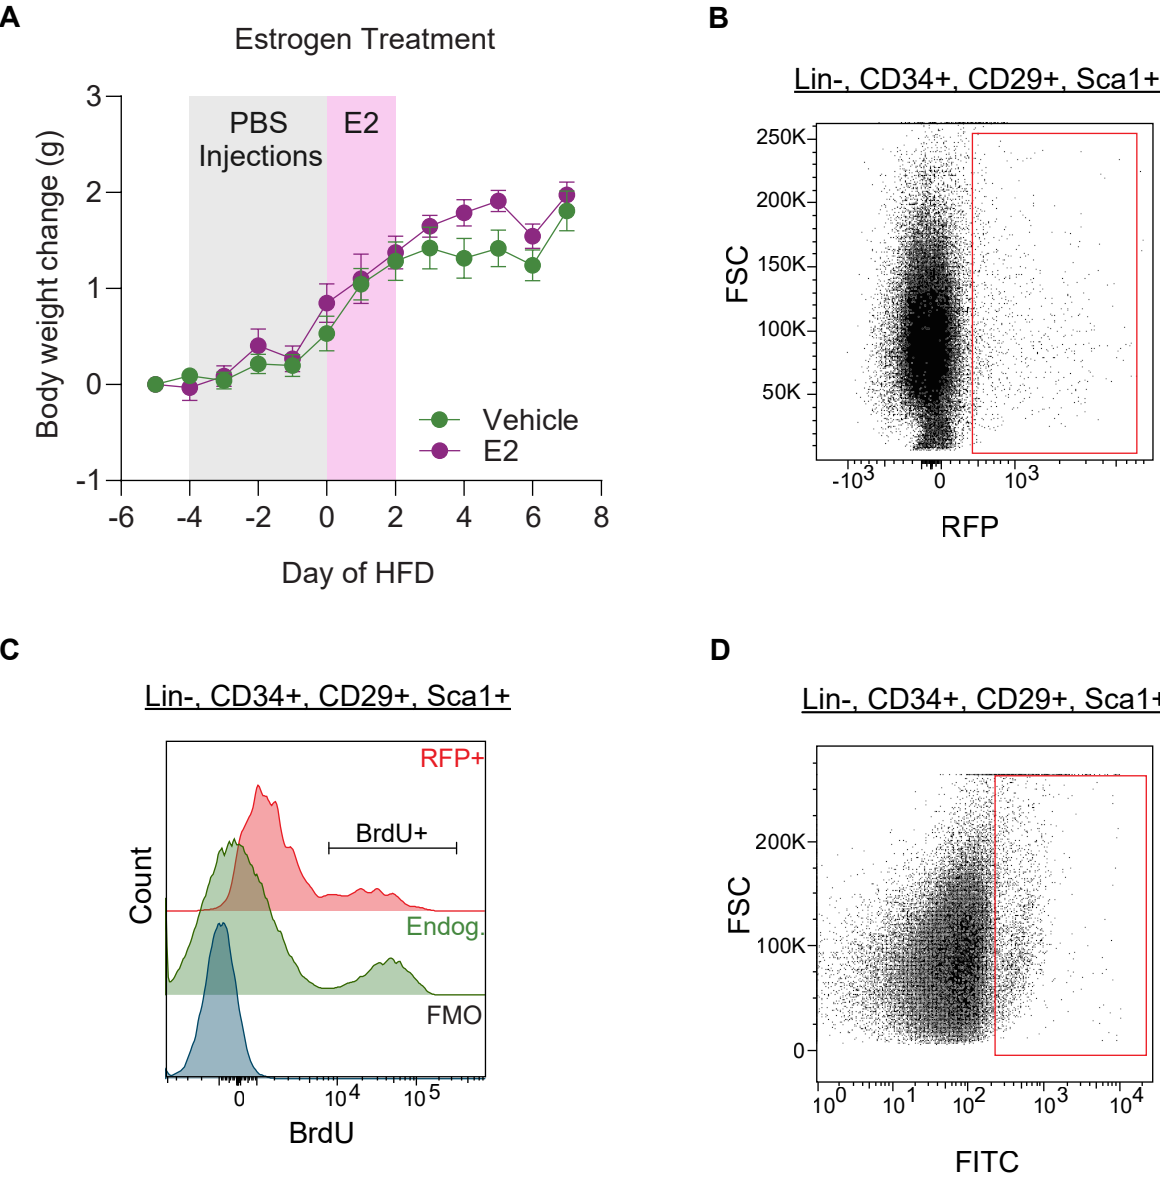

**Figure S2. Estradiol drives female APC proliferation in an ER $\alpha$ -dependent manner, Related to Figure 3.**

**(A)** Body weight change during vehicle or E2 treatment (day 0 to 2 of a HFD) in female mice (n= 14-19 mice per group). **(B)** Representative flow cytometry plot identifying transplanted wildtype APCs (RFP+) into wildtype male VWAT. **(C)** Representative histogram of BrdU incorporation into endogenous (RFP -) and transplanted (RFP+) APCs demonstrating that wildtype APCs maintain proliferation capacity after transplantation as described in Jeffery et. al. 2016. **(D)** Representative flow cytometry plot identifying transplanted ER $\alpha$ -KO APCs (GFP+) in female recipient SWAT. Statistical significance was determined by one-way ANOVA with Šidák's tests for panel A. Error bars represent mean  $\pm$  S.E.M. E2: 17 $\beta$ -estradiol, HFD: high-fat diet, FSC: forward scatter, BrdU: bromodeoxyuridine, Endog: endogenous cells, FMO: fluorescence minus one.

Figure S3

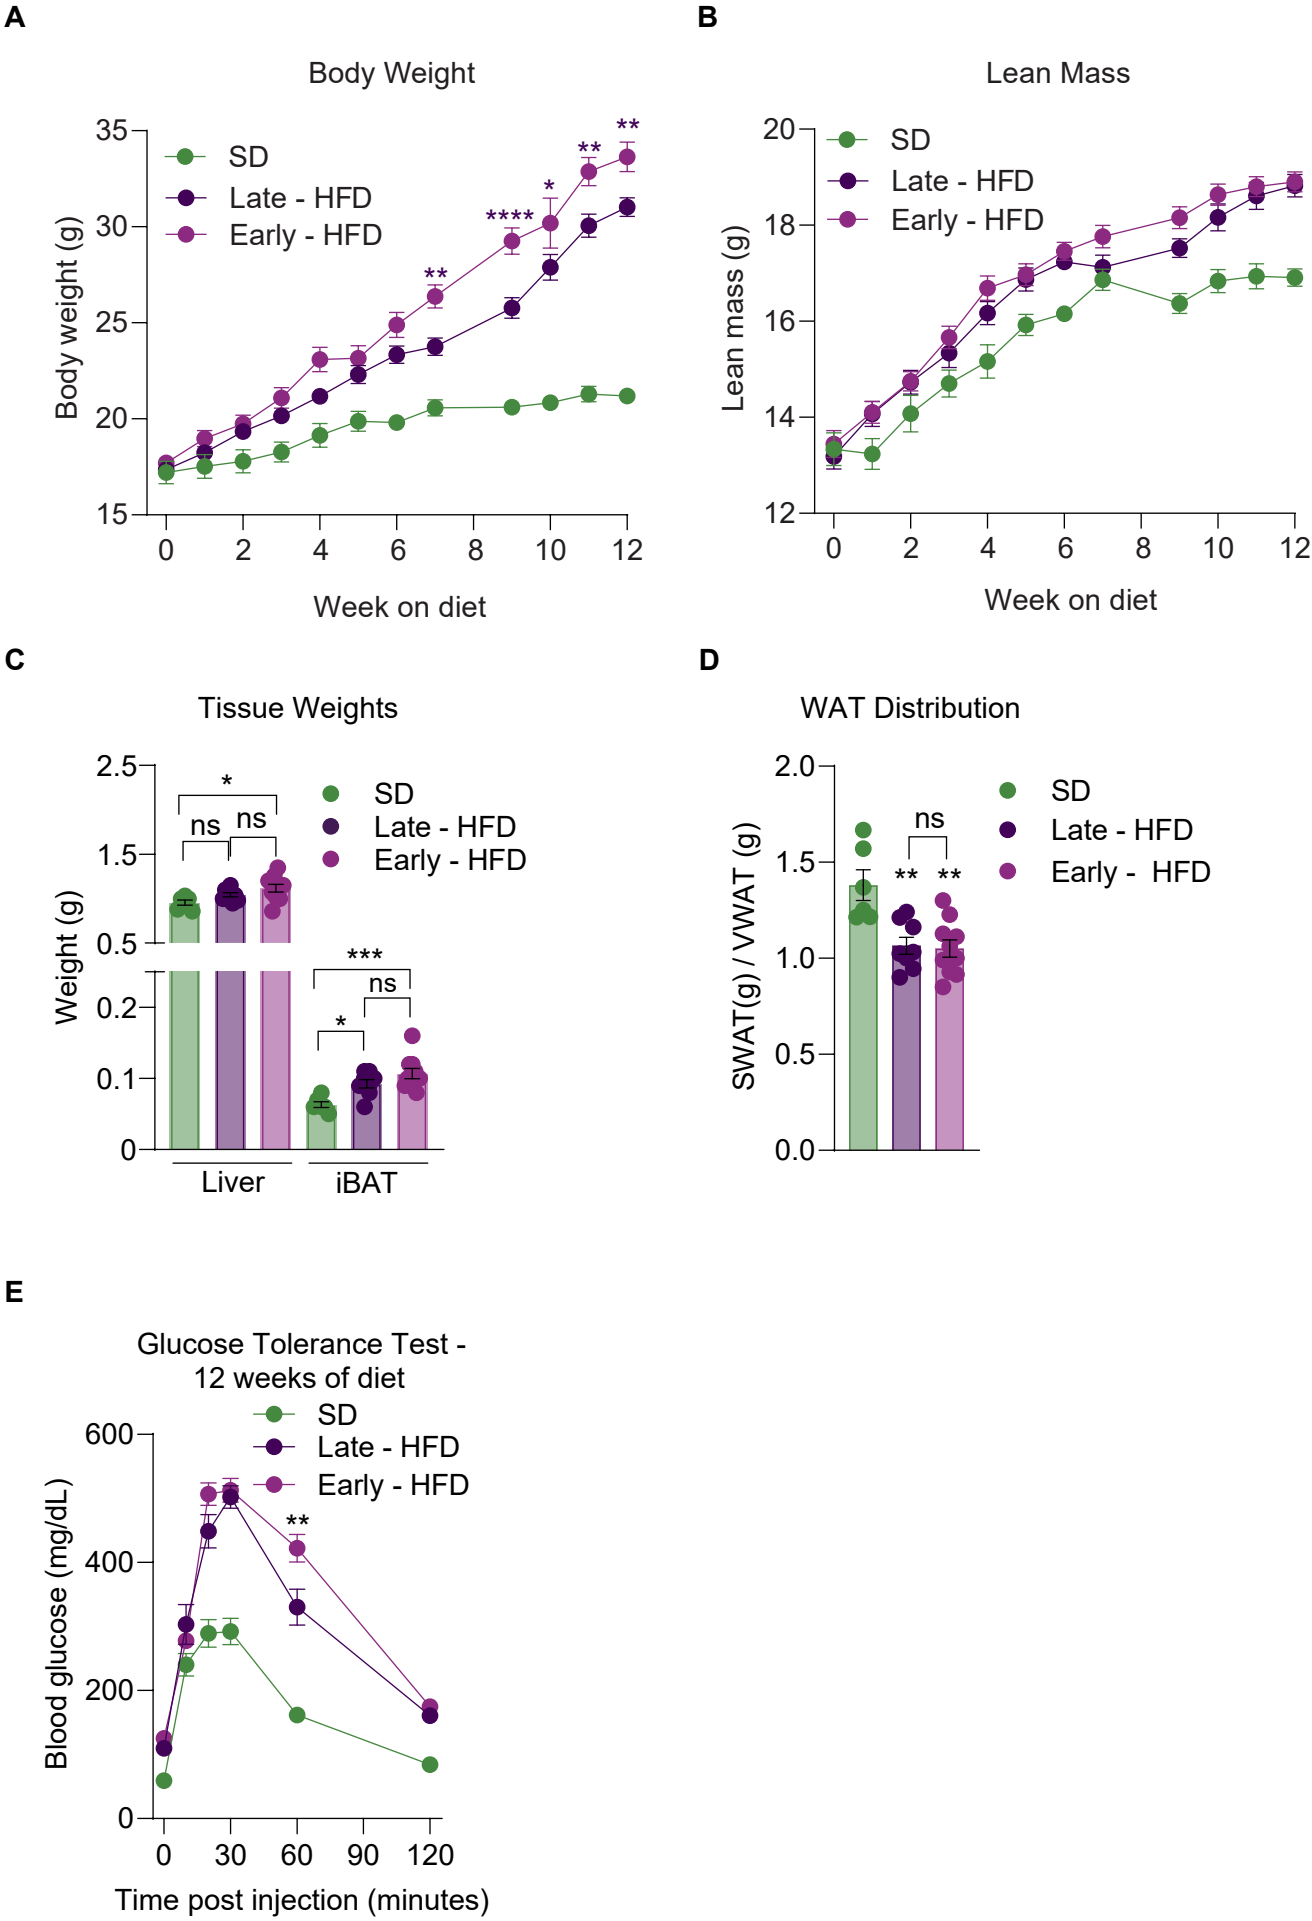

**Figure S3. Timing of HFD determines hyperplasia in female mice, Related to Figure 4.**

**(A)** Body weight and lean mass weight **(B)** of female mice during 12 weeks of SD or HFD feeding. **(C)** Liver and iBAT weight after 12 weeks of SD or HFD feeding. **(D)** WAT distribution (SWAT/VWAT) after 12 weeks of SD or HFD feeding. **(E)** Blood glucose levels during glucose tolerance test. N= 6-10 mice per group. Statistical significance was determined by ordinary two-way ANOVA with Tukey's test for panels A, B, and E and ordinary one-way ANOVA with Tukey's test for panel C and D. Error bars represent mean  $\pm$  S.E.M. ns= not significant, \* $p < 0.05$ , \*\* $p < 0.01$ , \*\*\* $p < 0.001$ , \*\*\*\* $p < 0.0001$ . SD: standard diet, HFD: high-fat diet, iBAT: interscapular brown adipose tissue.

Figure S4

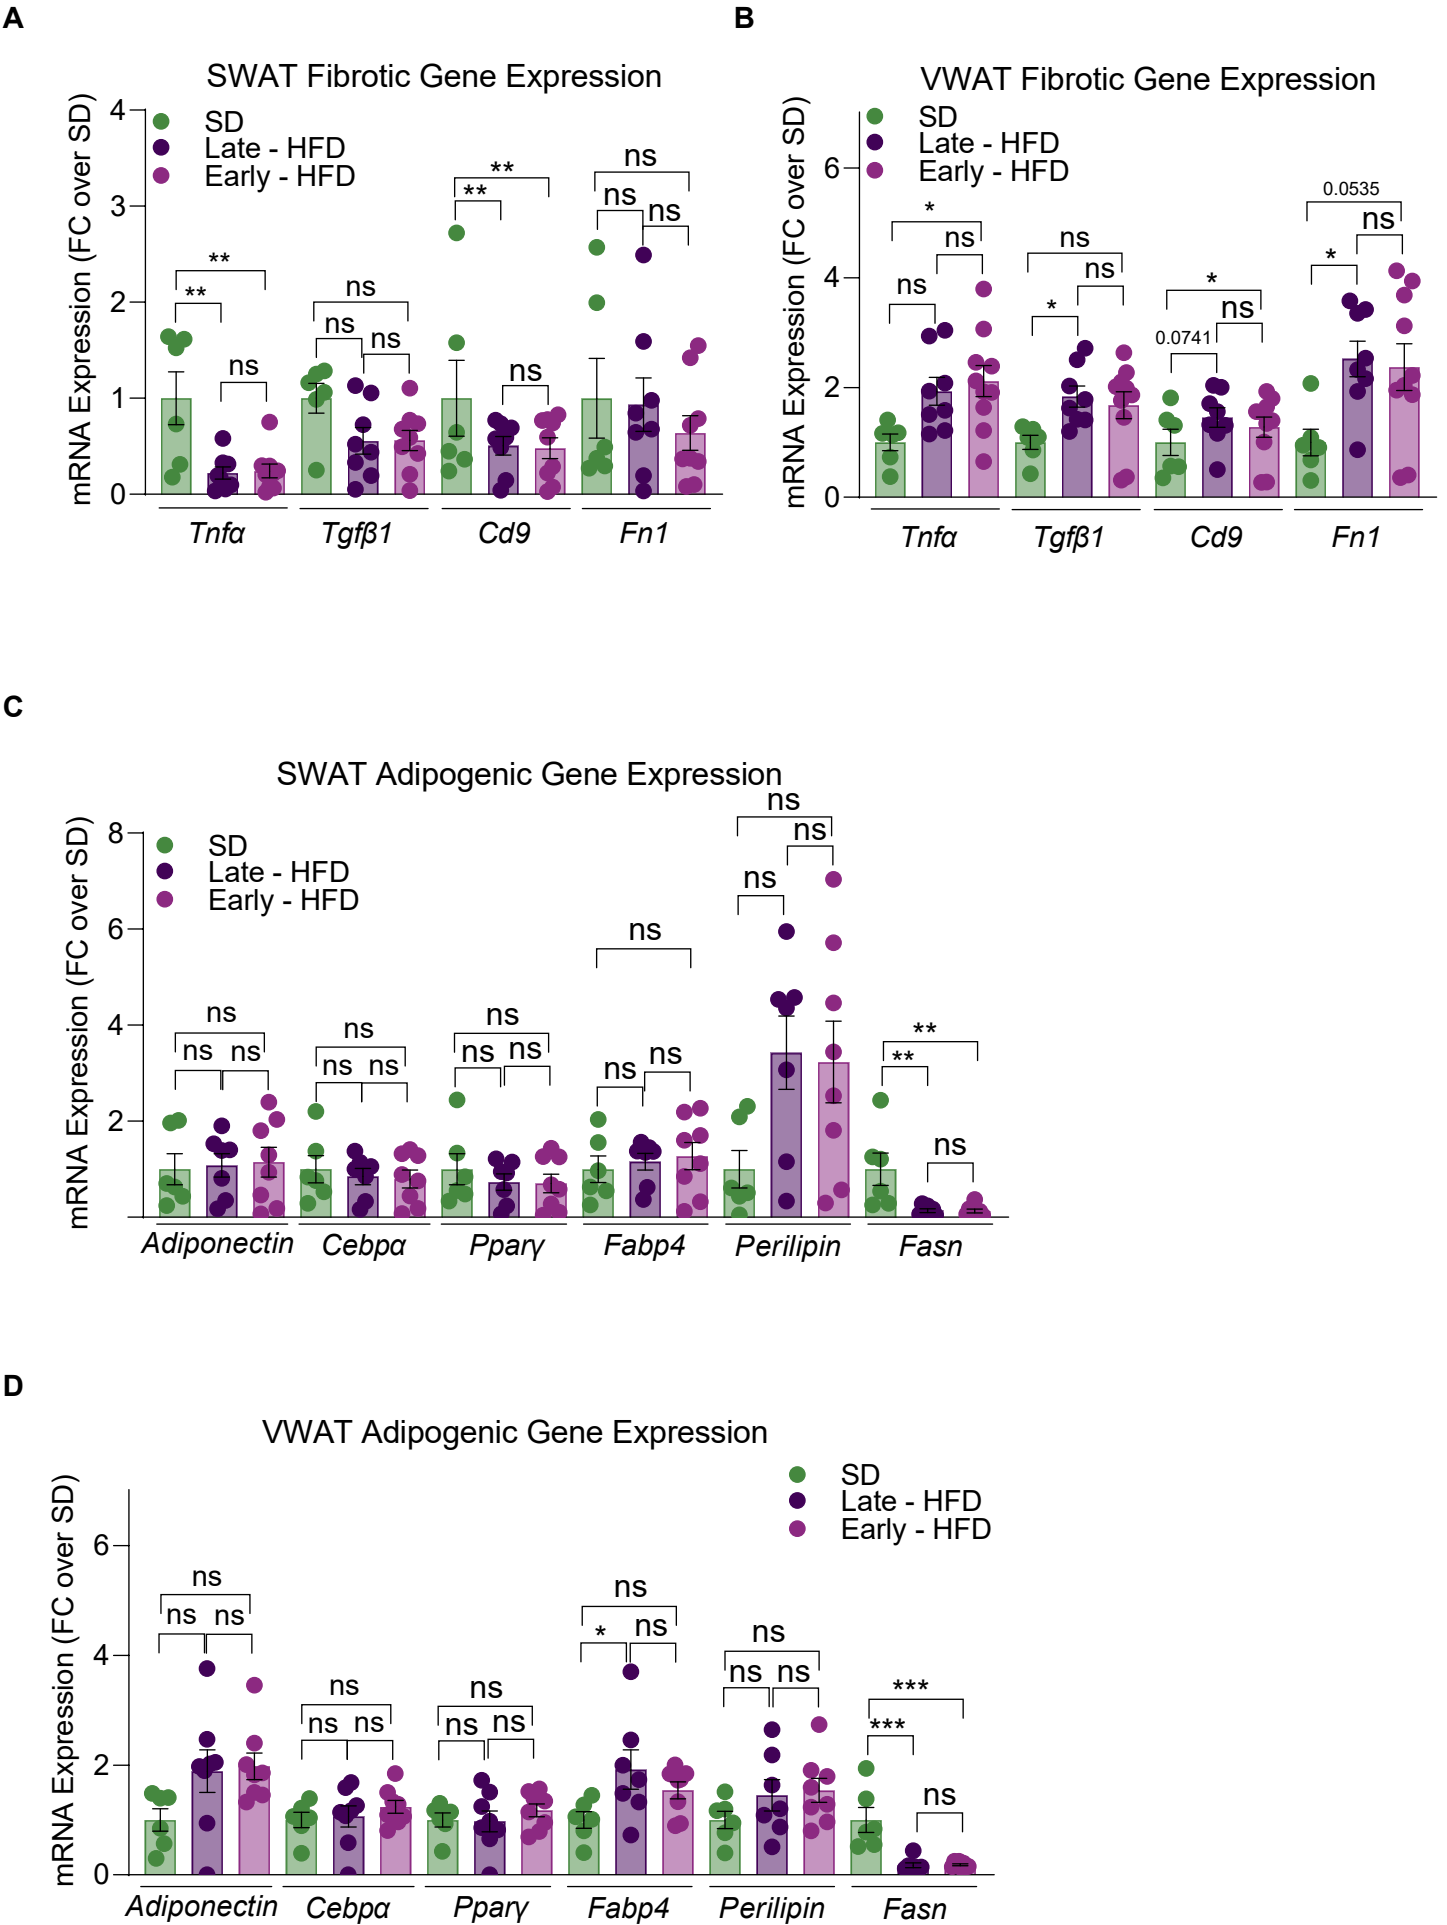

**Figure S4. Timing of HFD does not impact expression of fibrotic or adipogenic genes in WAT, Related to Figure 4.**

Gene expression of several fibrotic genes quantified by qPCR in SWAT **(A)** and **(B)** VWAT of female mice after 12 weeks of SD or HFD feeding. Gene expression of several adipogenic genes quantified by qPCR in SWAT **(C)** and **(D)** VWAT of female mice after 12 weeks of SD or HFD feeding. Data presented as fold change (FC) over SD after normalizing to housekeeping gene (*Tbk1*). N= 6-10 mice per group. Statistical significance was determined by ordinary one-way ANOVA for every gene with Tukey's test. Error bars represent mean  $\pm$  S.E.M. ns= not significant, \*p<0.05, \*\*p<0.01, \*\*\*p<0.001. SD: standard diet, HFD: high-fat diet, VWAT: perigonadal fat, SWAT: inguinal subcutaneous fat.

**Table S1. Primers used for qPCR analysis, Related to Figure 4 and Figure S4.**

| Gene name          | Forward Primer (5'-3')  | Reverse Primer (5'-3')  |
|--------------------|-------------------------|-------------------------|
| <i>Tbk1</i>        | AGGGCTTTGTGACGGGAACAG   | GGCACCCGGTCAAATGAGA     |
| <i>Cd9</i>         | ATGCCGGTCAAAGGAGGTAG    | GCCATAGTCCAATAGCAAGCA   |
| <i>Tnfa</i>        | GCCTGTAGCCACGTCGTAGC    | CGGGGCAGCCTTGTCCCTTG    |
| <i>Fn1</i>         | GGCCACCATTACTGGTCTGG    | GGAAGGGTAACCAGTTGGGG    |
| <i>Tgfβ1</i>       | ACTGGAGTTGTACGGCAGTG    | GGGGCTGATCCC GTTGATT    |
| <i>Adiponectin</i> | GGAGATGCAGGTCTTCTTGG    | GCGATACACATAAGCGGCTTC   |
| <i>Pparγ</i>       | GCCTGCGGAAGCCCTTTGGT    | AAGCCTGGGCGGTCTCCACT    |
| <i>Cebpa</i>       | CCCAGAGGACCAATGAAATGAAG | TAGCCGGAGGAAGCTAAGAC    |
| <i>Fabp4</i>       | GGGATGGAAAGTCGACCACA    | CGCCTTTCATAACACATTCCACC |
| <i>Perilipin</i>   | GGGCTGTCTGAGACTGAGGT    | TCCTTACTCTCCACGCTGTAAC  |
| <i>Fasn</i>        | GGAGGTGGTGATAGCCGGTAT   | TGGGTAATCCATAGAGCCCAG   |
